# Supplementary figures and images for: Pseudo‐hyperglucagonemia was observed in pancreatectomized patients when measured by glucagon sandwich enzyme‐linked immunosorbent assay
Source: PubMed Central journal article supplement — J Diabetes Investig. 2020 Jul 17;12(2):286–9. doi: 10.1111/jdi.13325 (PMC7858105; doi:10.1111/jdi.13325), 2020-07-17

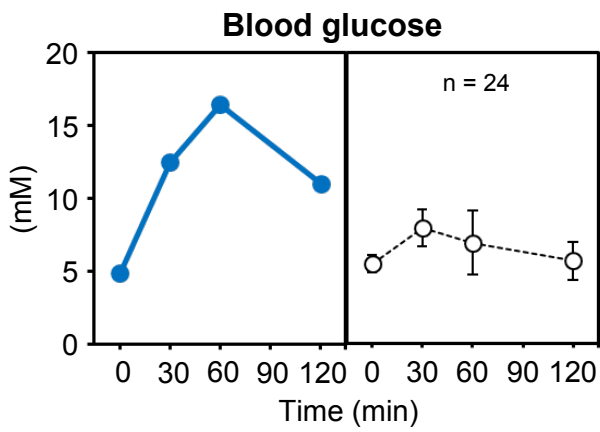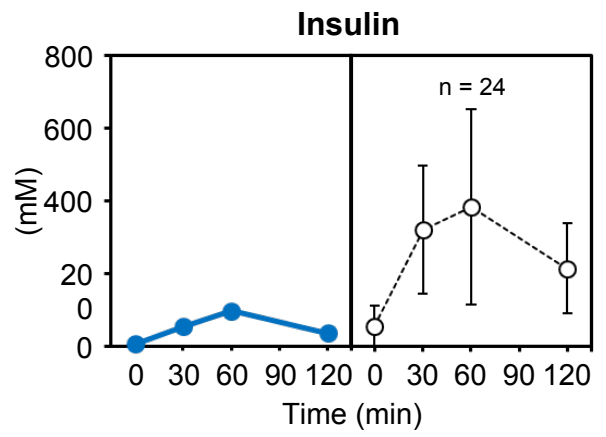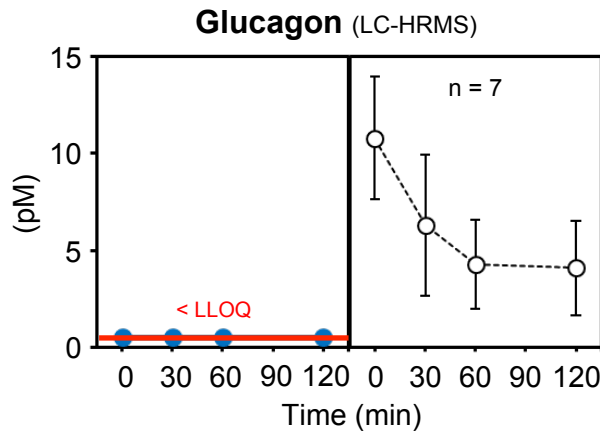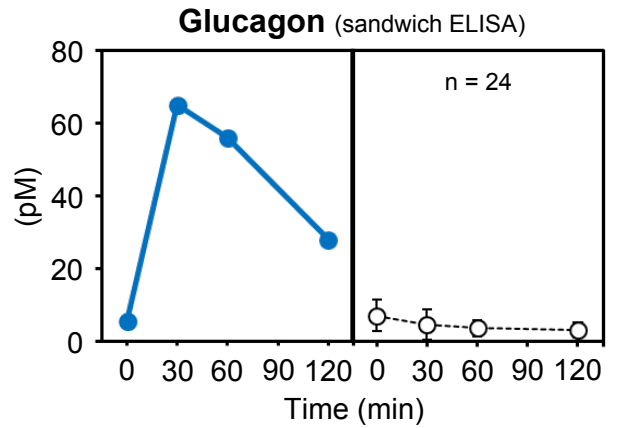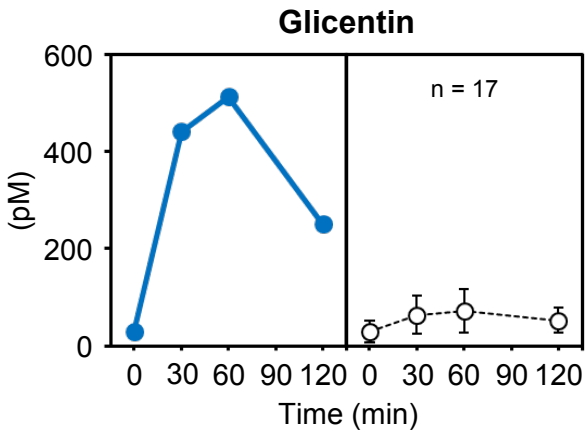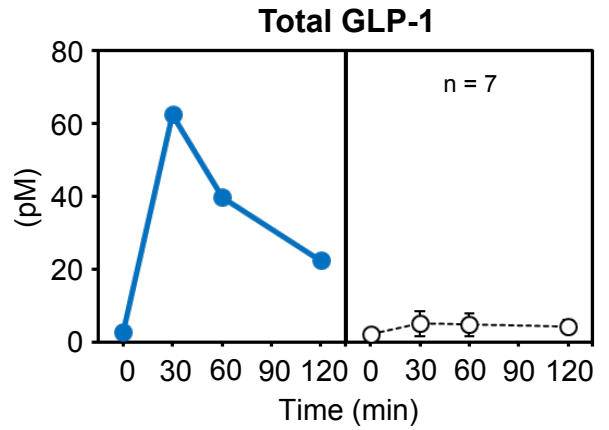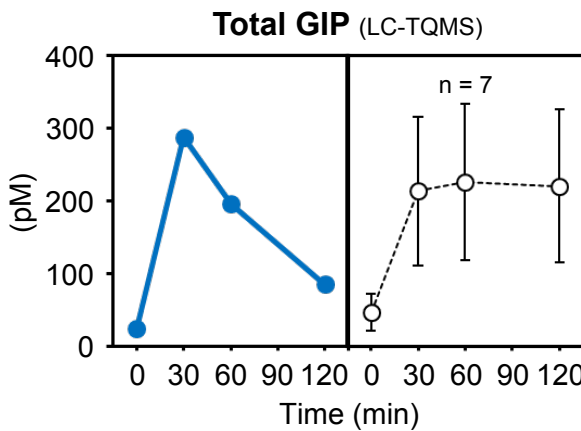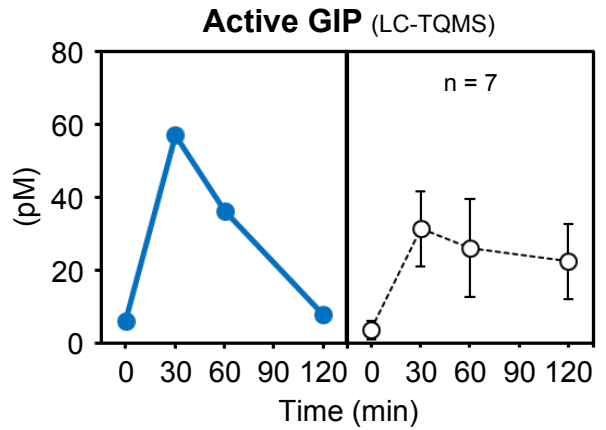

● Patient 1

○ Healthy subjects

Figure S1 Kobayashi et al.

Supplement: JDI-12-286-s001.pdf [file JDI-12-286-s001.pdf]

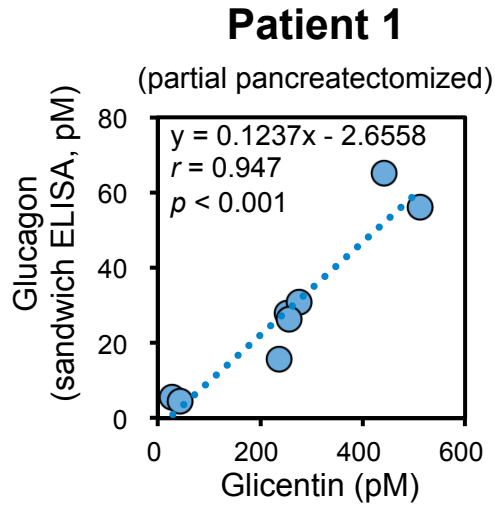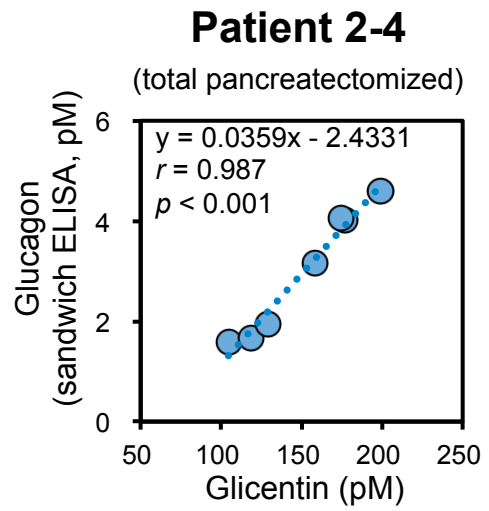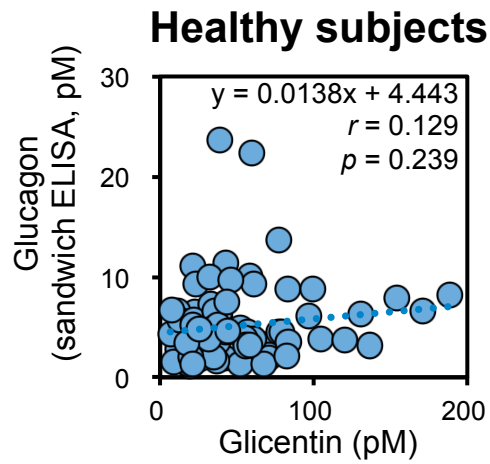

Figure S2 Kobayashi et al.

Supplement: JDI-12-286-s002.pdf [file JDI-12-286-s002.pdf]

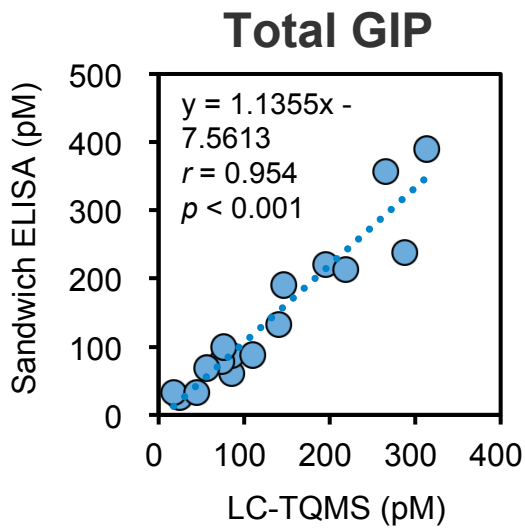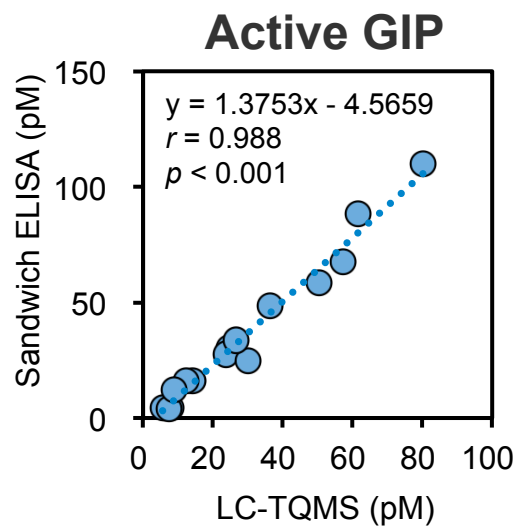

Figure S3 Kobayashi et al.

Supplement: JDI-12-286-s003.pdf [file JDI-12-286-s003.pdf]
